## SUPPLEMENTARY INFORMATION

### Study system

The classification of fast- and slow-living species was based on presence/absence of long-term diapause in the egg stage of each species, following Furness et al. (2015). All study subjects were raised from the egg stage in our lab (with the exception of 7 individuals of the slow species *Chromaphyosemion splendopleure*, which were bought as young adults). Two fast-living species were not originally included in the phylogeny by Furness et al. (2015) and were subsequently added based on other published assessments (*Ophthalmolebias constanciae* within the *Simpsonichthys* genus (Pohl et al. 2015), and *Nothobranchius kadleci*, a sister species of *Nothobranchius furzeri* (Dorn et al. 2014)). Eggs were obtained from dedicated hobbyists, or from our own laboratory stock populations. Fast- and slow-living species vary similarly in regard to how long they have been kept in captive conditions, but when available, we have included the collection locale, and the time kept in aquaria since collection from the wild in Table S1.

After hatching, fry were kept in groups (four to six individuals) in 13L plastic tanks until sexed, and then kept as pairs (female and male, also in 13L tanks). However, due to perceived male aggression, some species ( $N = 2$  slow,  $N = 5$  fast, see Table S2-S5) were kept as trios (one male and two females), to minimise harassment of females.

### Maintenance

All tanks were furnished with gravel, and environmental enrichment in the form of a small terracotta pot, and one or two floating acrylic yarn mops. Snails (*Planorbarius*

*corneus*) and small pieces of plants (java moss (*Taxiphyllum barbieri*) and/or süßwassertang (*Lomariopsis* sp.)) were added to the tanks to maintain good water quality. White plastic sheets were placed behind and between all home tanks to eliminate interaction between individuals of different tanks. The tanks of the fast-living species were also provided with 0.75L containers filled with coconut peat as a breeding substrate. All fish were kept at a 12:12 light:dark cycle at a water temperature of 23-25 °C. Juveniles were fed *Artemia* nauplii, with red midge larvae added to the adult diet, ad libitum, three times a day (once a day on weekends). All experiments were conducted on fish that had reached sexual maturity. For all tanks we used tap water that had been aerated for a minimum of 24 hours, and treated with Sera Aquatan to remove any potentially harmful substances. Water for the home tanks and experimental tanks of *Nothobranchius guentheri* and *Nothobranchius kadleci* were treated with extra NaCl (1.16 mg/L) to reduce the risk of *Oodinium* parasite infection.

### **Residuals and priors for linear models**

Count data (number of attacks) were fit with Poisson-distributed residuals (log-link), while the other traits were fit with Gaussian errors (confirmed by visual inspections of the residuals). Flat priors were used on the fixed effects, and random effects were fit with parameter-expanded locally non-informative priors (Murphy 2007). The Bayesian models were run with a burnin of 5000 iterations, after which every 1000th iteration was saved so as to produce 1000 posterior samples. The autocorrelations between parameter estimates were assessed to ensure they were within the interval of -0.1 and 0.1.

### **Standard Metabolic Rate**

Fish with a mass less than  $\sim 0.65$  g, were placed in 21.8mL resting glass chambers, while larger fish ( $>0.65$ g) were placed in 120.8mL resting acrylic chambers. The trials were run overnight for approximately 17h. Over this time, oxygen consumption was measured during 30-minute periods. These periods included a 7-minute flush phase, when water from the outside bath was circulated through the chambers. Then a 3-minute wait phase, when the water circulation to the outside bath was discontinued, but measurements were not taken, to eliminate the non-linear starting phase. Then a 20-minute measurement phase was initiated, where the slope of the oxygen concentration decrease over time was estimated. To reduce the effects of handling stress and spontaneous activity on the measurements, only data from 00:00 to 05:00 was used to estimate oxygen consumption. Resting chambers were air-dried daily before respirometry trials. The whole system was cleaned weekly with a bleach solution and partial water changes.

### **Timing of behavioural experiments**

Experiments were conducted (30<sup>th</sup> of January 2016 - 9<sup>th</sup> of June 2017) in bouts: the first half (starting in January 2016) of 2016 and the first half (starting December 2016) of 2017. Both fast- and slow-living species were tested during these periods. Measurements of SMR and mirror tests overlapped (randomised among species), with a minimum period of 22 hours between tests.

Figure S1. Relationship between the time kept in aquaria for each species, and the pace of life-history. PC1 of life-history was obtained by extracting the first principal component of a PCA on the species means of log<sub>10</sub>-transformed time until sexual maturity in males (days), log<sub>10</sub>-transformed growth rate (cm/day), and reproductive rate (eggs/female/month). Year collected was obtained from the collection ID of each species for which it was available. There was no significant association between year collected and PC1 of life-history (Spearman's rho = 0.038, P = 0.89).

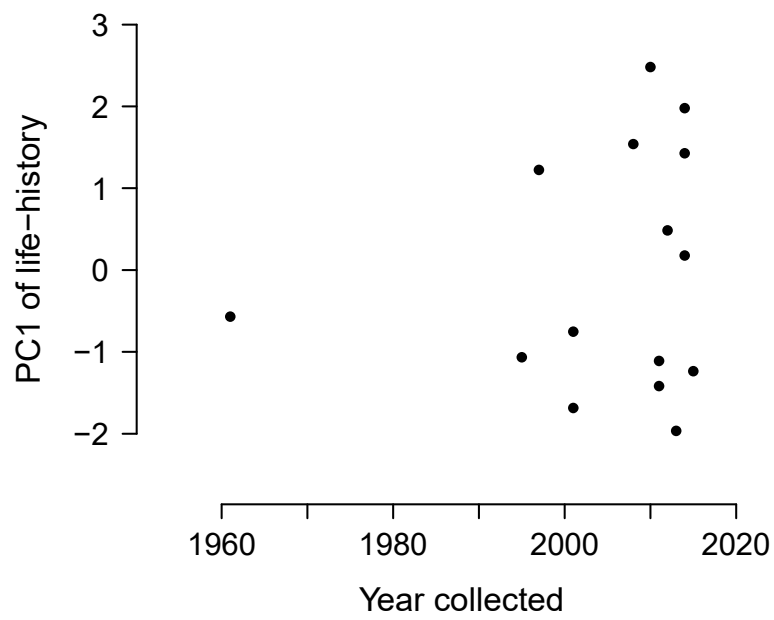

Table S1. Collection IDs for a subset of the species used in the experiments.

| <b>Species</b>                        | <b>Collection ID</b>                                                         | <b>Year collected</b> |
|---------------------------------------|------------------------------------------------------------------------------|-----------------------|
| <b>Aphyosemion striatum</b>           | “GEBL CG 1961”                                                               | 1961                  |
| <b>Austrolebias nigripinnis</b>       | “La Peregrina 2011”                                                          | 2011                  |
| <b>Austrolebias wolterstorffi</b>     | “Velasquez 2008”                                                             | 2008                  |
| <b>Callopanchax toddi</b>             | “Takhori GM 1997”                                                            | 1997                  |
| <b>Chromamphyosemion splendoplure</b> | “Bimbia Camp 2013”                                                           | 2013                  |
| <b>Fundulopanchax cinnamomeus</b>     | “Dakoni Bafor” 2001                                                          | 2001                  |
| <b>Fundulopanchax filamentosus</b>    | “Ikeja”                                                                      |                       |
| <b>Fundulopanchax scheeli</b>         | Data not available                                                           |                       |
| <b>Gnatholebias zonatus</b>           | “Finca Palmas COL 2014” or<br>“Las Mercedes VEN 2014”                        | 2014                  |
| <b>Nematolebias whitei</b>            | “Buzios”                                                                     |                       |
| <b>Nothobranchius guentheri</b>       | “ZAN 2014”                                                                   | 2014                  |
| <b>Nothobranchius kadleci</b>         | “Save River MZCS 2008” or<br>“Nhamatanda MZCS 2011” or<br>“Pungwe MZCS 2012” | 2008/2011/201<br>2    |
| <b>Notholebias minimus</b>            | “Campo Grande 2012”                                                          | 2012                  |
| <b>Opthalmolebias constanciae</b>     | “Barra de Sao Joao 1995”                                                     | 1995                  |
| <b>Pachypanchax playfairii</b>        | Data not available                                                           |                       |
| <b>Pterolebias longipinnis</b>        | “Rio San Pablo II BPB 2014”                                                  | 2014                  |
| <b>Anablepsoides amphoreus</b>        | “Tafelberg 2001”                                                             | 2001                  |
| <b>Anablepsoides iridescens</b>       | “Peru CI 2015”                                                               | 2015                  |

|                                     |                                      |      |
|-------------------------------------|--------------------------------------|------|
| <b>Cynodonichthys fuscolineatus</b> | “Senderos Oasis, Cano Negro<br>2011” | 2011 |
| <b>Scriptaphyosemion cauveti</b>    | “Kindia”                             |      |

---

Table S2. Sample sizes for the open field test. \* Indicates that the individuals were reared in groups, two females and one male. The total number of individuals was 315.

| <b>Species</b>                                | <b>Females</b> | <b>Males</b> | <b>Total</b> |
|-----------------------------------------------|----------------|--------------|--------------|
| <b><i>Aphyosemion striatum</i></b>            | 9              | 10           | 19           |
| <b><i>Austrolebias nigripinnis</i>*</b>       | 6              | 3            | 9            |
| <b><i>Austrolebias wolterstorffi</i></b>      | 4              | 4            | 8            |
| <b><i>Callopanchax toddi</i></b>              | 7              | 6            | 13           |
| <b><i>Chromaphyosemion splendopleure</i>*</b> | 3              | 5            | 8            |
| <b><i>Fundulopanchax cinnamomeus</i></b>      | 8              | 8            | 16           |
| <b><i>Fundulopanchax filamentosus</i></b>     | 8              | 8            | 16           |
| <b><i>Fundulopanchax scheeli</i></b>          | 9              | 9            | 18           |
| <b><i>Gnatholebias zonatus</i></b>            | 9              | 9            | 18           |
| <b><i>Nematolebias whitei</i>*</b>            | 16             | 10           | 26           |
| <b><i>Nothobranchius guentheri</i>*</b>       | 18             | 8            | 26           |
| <b><i>Nothobranchius kadleci</i>*</b>         | 7              | 5            | 12           |
| <b><i>Notholebias minimus</i>*</b>            | 6              | 4            | 10           |
| <b><i>Ophtalmolebias constanciae</i></b>      | 11             | 11           | 22           |
| <b><i>Pachypanchax playfairii</i></b>         | 8              | 8            | 16           |
| <b><i>Pterolebias longipinnis</i></b>         | 5              | 4            | 9            |
| <b><i>Anablepsoides amphoreus</i></b>         | 9              | 9            | 18           |
| <b><i>Anablepsoides iridescens</i></b>        | 8              | 7            | 15           |
| <b><i>Cynodonichthys fuscolineatus</i>*</b>   | 3              | 2            | 5            |
| <b><i>Scriptaphyosemion cauveti</i></b>       | 16             | 15           | 31           |



Table S3. Sample sizes for the emergence test. \* Indicates that the individuals were reared in groups, two females and one male. The total number of individuals was 267.

| <b>Species</b>                         | <b>Females</b> | <b>Males</b> | <b>Total</b> |
|----------------------------------------|----------------|--------------|--------------|
| <b>Aphyosemion striatum</b>            | 9              | 10           | 19           |
| <b>Austrolebias nigripinnis*</b>       | 6              | 2            | 8            |
| <b>Austrolebias wolterstorffi</b>      | 4              | 4            | 8            |
| <b>Callopanchax toddi</b>              | 7              | 6            | 13           |
| <b>Chromaphyosemion splendopleure*</b> | 1              | 6            | 7            |
| <b>Fundulopanchax cinnamomeus</b>      | 7              | 7            | 14           |
| <b>Fundulopanchax filamentosus</b>     | 7              | 7            | 14           |
| <b>Fundulopanchax scheeli</b>          | 5              | 9            | 14           |
| <b>Gnatholebias zonatus</b>            | 8              | 8            | 16           |
| <b>Nematolebias whitei*</b>            | 6              | 10           | 16           |
| <b>Nothobranchius guentheri*</b>       | 10             | 8            | 18           |
| <b>Nothobranchius kadleci*</b>         | 7              | 4            | 11           |
| <b>Notholebias minimus*</b>            | 7              | 3            | 10           |
| <b>Ophtalmolebias constanciae</b>      | 4              | 5            | 9            |
| <b>Pachypanchax playfairii</b>         | 8              | 8            | 16           |
| <b>Pterolebias longipinnis</b>         | 4              | 3            | 7            |
| <b>Anablepsoides amphoreus</b>         | 9              | 8            | 17           |
| <b>Anablepsoides iridescens</b>        | 8              | 8            | 16           |
| <b>Cynodonichthys fuscolineatus*</b>   | 3              | 2            | 5            |
| <b>Scriptaphyosemion cauveti</b>       | 14             | 15           | 29           |

Table S4. Sample sizes for the mirror test. \* Indicates that the individuals were reared in groups, two females and one male. The total number of individuals was 121.

| <b>Species</b>                         | <b>Males</b> |
|----------------------------------------|--------------|
| <b>Aphyosemion striatum</b>            | 10           |
| <b>Austrolebias wolterstorffi</b>      | 2            |
| <b>Callopanchax toddi</b>              | 6            |
| <b>Chromaphyosemion splendopleure*</b> | 5            |
| <b>Fundulopanchax cinnamomeus</b>      | 7            |
| <b>Fundulopanchax filamentosus</b>     | 6            |
| <b>Fundulopanchax scheeli</b>          | 8            |
| <b>Gnatholebias zonatus</b>            | 8            |
| <b>Nematolebias whitei*</b>            | 7            |
| <b>Nothobranchius guentheri*</b>       | 8            |
| <b>Nothobranchius kadleci*</b>         | 4            |
| <b>Notholebias minimus*</b>            | 3            |
| <b>Ophtalmolebias constanciae</b>      | 9            |
| <b>Pachypanchax playfairii</b>         | 8            |
| <b>Pterolebias longipinnis</b>         | 3            |
| <b>Anablepsoides amphoreus</b>         | 7            |
| <b>Anablepsoides iridescens</b>        | 7            |
| <b>Cynodonichthys fuscolineatus*</b>   | 2            |
| <b>Scriptaphyosemion cauveti</b>       | 11           |

Table S5. Sample sizes for the metabolic rate test. \* Indicates that the individuals were reared in groups, two females and one male. The total number of individuals was 233.

| <b>Species</b>                         | <b>Females</b> | <b>Males</b> | <b>Total</b> |
|----------------------------------------|----------------|--------------|--------------|
| <b>Aphyosemion striatum</b>            | 6              | 10           | 16           |
| <b>Austrolebias wolterstorffi</b>      | 3              | 2            | 5            |
| <b>Callopanchax toddi</b>              | 7              | 6            | 13           |
| <b>Chromaphyosemion splendopleure*</b> | 3              | 2            | 5            |
| <b>Fundulopanchax cinnamomeus</b>      | 7              | 7            | 14           |
| <b>Fundulopanchax filamentosus</b>     | 8              | 6            | 14           |
| <b>Fundulopanchax scheeli</b>          | 8              | 9            | 17           |
| <b>Gnatholebias zonatus</b>            | 8              | 7            | 15           |
| <b>Nematolebias whitei*</b>            | 4              | 9            | 13           |
| <b>Nothobranchius guentheri*</b>       | 8              | 7            | 15           |
| <b>Nothobranchius kadleci*</b>         | 2              | 4            | 6            |
| <b>Notholebias minimus*</b>            | 2              | 2            | 4            |
| <b>Ophtalmolebias constanciae</b>      | 9              | 9            | 18           |
| <b>Pachypanchax playfairii</b>         | 3              | 4            | 7            |
| <b>Pterolebias longipinnis</b>         | 4              | 2            | 6            |
| <b>Anablepsoides amphoreus</b>         | 7              | 8            | 15           |
| <b>Anablepsoides iridescens</b>        | 5              | 7            | 12           |
| <b>Cynodonichthys fuscolineatus*</b>   | 4              | 6            | 10           |
| <b>Scriptaphyosemion cauveti</b>       | 14             | 14           | 28           |

Table S6. Results of the probabilistic principal component analysis (PPCA) on life-history, represented by log10-transformed maturation time (days), log10-transformed reproductive rate (eggs/female/month), and log10-transformed growth rate (cm/day). The PPCA was performed on the correlation matrix of the species means, with imputation of missing values.

|                                                            | PC1    | PC2    | PC3    |
|------------------------------------------------------------|--------|--------|--------|
| <i>Variance explained</i>                                  |        |        |        |
| R2                                                         | 0.754  | 0.147  | 0.0995 |
| Cumulative R2                                              | 0.754  | 0.900  | 1.00   |
| <i>Loadings</i>                                            |        |        |        |
| Log10-transformed maturation time (days)                   | -0.633 | 0.704  | 0.321  |
| Log10-transformed reproductive rate<br>(eggs/female/month) | 0.466  | 0.0161 | 0.885  |
| Log10-transformed growth rate (cm/day)                     | 0.618  | 0.710  | -0.339 |

Table S7. Intraclass correlations (ICCs) from Bayesian phylogenetic mixed model, estimated as the fraction of variance explained by phylogenetic effects and species effects, divided by the total variance (phylogenetic effects, species effects, and residuals). Activity is represented by  $\log_{10}$ -transformed mean speed (cm/s), boldness is represented by  $\log_{10}$ -transformed, mean centred and inverted latency to emerge +1 (s), metabolic rate is represented by  $\log_{10}$ -transformed standard metabolic rate (mg  $O_2$ /kg/h), and aggression is represented by the number of attacks.

| Parameter      | Posterior mode | Lower CI | Upper CI |
|----------------|----------------|----------|----------|
| Activity       | 0.545          | 0.365    | 0.755    |
| Boldness       | 0.447          | 0.278    | 0.651    |
| Metabolic rate | 0.257          | 0.143    | 0.509    |
| Aggression     | 0.198          | 0.0224   | 0.464    |

Table S8. Bayesian phylogenetic mixed model on activity, boldness, metabolic rate, and aggression, as response variables. This table contains the fixed predictor variables of the model; PC1 of life-history and sex (for the random effects, see table S8).

Activity is represented by  $\log_{10}$ -transformed mean speed (cm/s), boldness is represented by  $\log_{10}$ -transformed, mean centred and inverted latency to emerge +1 (s), metabolic rate is represented by  $\log_{10}$ -transformed standard metabolic rate (mg  $O_2$ /kg/h), and aggression is represented by the number of attacks.

| Response variable | Coefficient      | Posterior mode | Lower CI | Upper CI | PMC MC |
|-------------------|------------------|----------------|----------|----------|--------|
| Activity          | Intercept        | 0.172          | -0.0712  | 0.468    | 0.154  |
|                   | Sex (males)      | -0.0363        | -0.0906  | 0.0512   | 0.512  |
|                   | PC1 life-history | 0.0165         | -0.0779  | 0.150    | 0.646  |
| Boldness          | Intercept        | -0.0732        | -0.681   | 0.461    | 0.756  |
|                   | Sex (males)      | -0.0528        | -0.185   | 0.186    | 0.992  |
|                   | PC1 life-history | 0.0132         | -0.214   | 0.263    | 0.854  |
| Metabolic rate    | Intercept        | 34.6           | 30.1     | 41.3     | 0.001  |
|                   | Sex (males)      | -2.11          | -4.49    | 0.830    | 0.158  |
|                   | PC1 life-history | 1.37           | -1.27    | 3.55     | 0.342  |

|            |                      |        |       |       |        |
|------------|----------------------|--------|-------|-------|--------|
| Aggression | Intercept            | -0.537 | -1.63 | 0.228 | 0.130  |
|            | PC1 life-<br>history | 0.680  | 0.133 | 1.110 | 0.0240 |

---

Table S9. Bayesian phylogenetic mixed model on activity, boldness, metabolic rate, and aggression, as response variables. This table contains the random effects of the model; phylogeny, species and residuals (for the fixed effects, see table S7). Activity is represented by log<sub>10</sub>-transformed mean speed (cm/s), boldness is represented by log<sub>10</sub>-transformed, mean centred and inverted latency to emerge +1 (s), metabolic rate is represented by log<sub>10</sub>-transformed standard metabolic rate (mg O<sub>2</sub>/kg/h), and aggression is represented by the number of attacks.

| Response variable | Coefficient | Posterior mode | Lower CI              | Upper CI |
|-------------------|-------------|----------------|-----------------------|----------|
| Activity          | Phylogeny   | 0.00193        | 2.94x10 <sup>-8</sup> | 0.226    |
|                   | Species     | 0.00103        | 3.06x10 <sup>-8</sup> | 0.178    |
|                   | Residuals   | 0.0974         | 0.0872                | 0.121    |
| Boldness          | Phylogeny   | 0.00387        | 1.06x10 <sup>-5</sup> | 0.950    |
|                   | Species     | 0.00464        | 2.09x10 <sup>-6</sup> | 0.622    |
|                   | Residuals   | 0.619          | 0.512                 | 0.721    |
| Metabolic rate    | Phylogeny   | 0.746          | 8.28x10 <sup>-5</sup> | 84.3     |
|                   | Species     | 0.336          | 0.00198               | 65.0     |
|                   | Residuals   | 104            | 84.9                  | 124      |
| Aggression        | Phylogeny   | 0.0195         | 1.18x10 <sup>-6</sup> | 2.21     |
|                   | Species     | 0.0107         | 7.32x10 <sup>-7</sup> | 1.82     |
|                   | Residuals   | 4.36           | 2.63                  | 7.10     |



Table S10. Among species correlations from Bayesian phylogenetic mixed model on activity, boldness, metabolic rate, and aggression, as response variables, no fixed effects, and with species as random effect. The model was run on the individual level, while only species level correlations were extracted. Activity is represented by log<sub>10</sub>-transformed mean speed (cm/s), boldness is represented by log<sub>10</sub>-transformed, mean centred and inverted latency to emerge +1 (s), metabolic rate is represented by log<sub>10</sub>-transformed standard metabolic rate (mg O<sub>2</sub>/kg/h), and aggression is represented by the number of attacks.

|                             | Posterior mode | Lower CI | Upper CI |
|-----------------------------|----------------|----------|----------|
| Metabolic rate - boldness   | 0.478          | -0.0205  | 0.768    |
| Activity - boldness         | 0.404          | 0.0323   | 0.744    |
| Activity - metabolic rate   | 0.177          | -0.211   | 0.708    |
| Aggression - metabolic rate | 0.515          | -0.108   | 0.900    |
| Aggression - activity       | -0.132         | -0.539   | 0.605    |
| Aggression - boldness       | 0.276          | -0.369   | 0.745    |

Table S11. Log<sub>10</sub>-transformed mean speed (cm/s) in the open field test. \* Indicates that the individuals were reared in groups, two females and one male. The total number of individuals was 315.

| <b>Species</b>                         | <b>Mean</b> | <b>SD</b> |
|----------------------------------------|-------------|-----------|
| <b>Aphyosemion striatum</b>            | -0.635      | 0.578     |
| <b>Austrolebias nigripinnis*</b>       | -0.531      | 0.464     |
| <b>Austrolebias wolterstorffi</b>      | -1.08       | 0.156     |
| <b>Callopanchax toddi</b>              | -0.884      | 0.409     |
| <b>Chromaphyosemion splendopleure*</b> | -1.38       | 0.155     |
| <b>Fundulopanchax cinnamomeus</b>      | -1.10       | 0.344     |
| <b>Fundulopanchax filamentosus</b>     | -0.691      | 0.340     |
| <b>Fundulopanchax scheeli</b>          | -0.468      | 0.442     |
| <b>Gnatholebias zonatus</b>            | -0.873      | 0.434     |
| <b>Nematolebias whitei*</b>            | -0.977      | 0.376     |
| <b>Nothobranchius guentheri*</b>       | -1.37       | 0.330     |
| <b>Nothobranchius kadleci*</b>         | -1.32       | 0.216     |
| <b>Notholebias minimus*</b>            | -1.16       | 0.318     |
| <b>Ophtalmolebias constanciae</b>      | -0.958      | 0.293     |
| <b>Pachypanchax playfairii</b>         | -1.71       | 0.348     |
| <b>Pterolebias longipinnis</b>         | -1.07       | 0.166     |
| <b>Anablepsoides amphoreus</b>         | -1.68       | 0.216     |
| <b>Anablepsoides iridescens</b>        | -1.55       | 0.492     |
| <b>Cynodonichthys fuscolineatus*</b>   | -1.23       | 0.447     |
| <b>Scriptaphyosemion cauveti</b>       | -1.14       | 0.275     |

Table S12. Log<sub>10</sub>-transformed, mean centred and inverted latency to emerge +1 (s) in the emergence test. \* Indicates that the individuals were reared in groups, two females and one male. The total number of individuals was 267.

| <b>Species</b>                         | <b>Mean</b> | <b>SD</b> |
|----------------------------------------|-------------|-----------|
| <b>Aphyosemion striatum</b>            | 2.14        | 1.35      |
| <b>Austrolebias nigripinnis*</b>       | 2.51        | 0.509     |
| <b>Austrolebias wolterstorffi</b>      | 1.74        | 0.487     |
| <b>Callopanchax toddi</b>              | 1.54        | 0.871     |
| <b>Chromaphyosemion splendopleure*</b> | 2.36        | 0.558     |
| <b>Fundulopanchax cinnamomeus</b>      | 1.55        | 1.01      |
| <b>Fundulopanchax filamentosus</b>     | 1.74        | 0.452     |
| <b>Fundulopanchax scheeli</b>          | 1.85        | 0.748     |
| <b>Gnatholebias zonatus</b>            | 2.18        | 0.421     |
| <b>Nematolebias whitei*</b>            | 2.86        | 0.532     |
| <b>Nothobranchius guentheri*</b>       | 1.29        | 0.869     |
| <b>Nothobranchius kadleci*</b>         | 1.10        | 0.808     |
| <b>Notholebias minimus*</b>            | 2.63        | 0.426     |
| <b>Ophtalmolebias constanciae</b>      | 2.92        | 0.528     |
| <b>Pachypanchax playfairii</b>         | 1.05        | 0.850     |
| <b>Pterolebias longipinnis</b>         | 3.04        | 0.206     |
| <b>Anablepsoides amphoreus</b>         | 2.25        | 0.628     |
| <b>Anablepsoides iridescens</b>        | 0.773       | 1.05      |
| <b>Cynodonichthys fuscolineatus*</b>   | 2.49        | 0.511     |
| <b>Scriptaphyosemion cauveti</b>       | 0.980       | 0.687     |

Table S13. Log<sub>10</sub>-transformed number of attacks +1 in the mirror test. \* Indicates that the individuals were reared in groups, two females and one male. The total number of individuals was 121.

| <b>Species</b>                         | <b>Mean</b> | <b>SD</b> |
|----------------------------------------|-------------|-----------|
| <b>Aphyosemion striatum</b>            | 0.276       | 0.384     |
| <b>Austrolebias wolterstorffi</b>      | 0.151       | 0.213     |
| <b>Callopanchax toddi</b>              | 0.447       | 0.615     |
| <b>Chromaphyosemion splendopleure*</b> | 0.0602      | 0.135     |
| <b>Fundulopanchax cinnamomeus</b>      | 0.0999      | 0.264     |
| <b>Fundulopanchax filamentosus</b>     | 0.639       | 0.471     |
| <b>Fundulopanchax scheeli</b>          | 0.496       | 0.354     |
| <b>Gnatholebias zonatus</b>            | 0.884       | 0.678     |
| <b>Nematolebias whitei*</b>            | 0.389       | 0.584     |
| <b>Nothobranchius guentheri*</b>       | 0.379       | 0.409     |
| <b>Nothobranchius kadleci*</b>         | 0.783       | 0.756     |
| <b>Notholebias minimus*</b>            | 0           | 0         |
| <b>Ophtalmolebias constanciae</b>      | 0.106       | 0.318     |
| <b>Pachypanchax playfairii</b>         | 0.540       | 0.616     |
| <b>Pterolebias longipinnis</b>         | 0.100       | 0.174     |
| <b>Anablepsoides amphoreus</b>         | 0.129       | 0.161     |
| <b>Anablepsoides iridescens</b>        | 0.129       | 0.161     |
| <b>Cynodonichthys fuscolineatus*</b>   | 0.801       | 0.707     |
| <b>Scriptaphyosemion cauveti</b>       | 0.189       | 0.319     |

Table S14. Log<sub>10</sub>-transformed standard metabolic rate (mg O<sub>2</sub>/kg/h) in the metabolic rate test. \* Indicates that the individuals were reared in groups, two females and one male. The total number of individuals was 233.

| <b>Species</b>                         | <b>Mean</b> | <b>SD</b> |
|----------------------------------------|-------------|-----------|
| <b>Aphyosemion striatum</b>            | 1.45        | 0.124     |
| <b>Austrolebias wolterstorffi</b>      | 1.60        | 0.064     |
| <b>Callopanchax toddi</b>              | 1.53        | 0.129     |
| <b>Chromaphyosemion splendopleure*</b> | 1.50        | 0.0688    |
| <b>Fundulopanchax cinnamomeus</b>      | 1.50        | 0.101     |
| <b>Fundulopanchax filamentosus</b>     | 1.52        | 0.110     |
| <b>Fundulopanchax scheeli</b>          | 1.67        | 0.0989    |
| <b>Gnatholebias zonatus</b>            | 1.57        | 0.140     |
| <b>Nematolebias whitei*</b>            | 1.39        | 0.153     |
| <b>Nothobranchius guentheri*</b>       | 1.52        | 0.115     |
| <b>Nothobranchius kadleci*</b>         | 1.62        | 0.180     |
| <b>Notholebias minimus*</b>            | 1.37        | 0.117     |
| <b>Ophtalmolebias constanciae</b>      | 1.51        | 0.103     |
| <b>Pachypanchax playfairii</b>         | 1.62        | 0.111     |
| <b>Pterolebias longipinnis</b>         | 1.37        | 0.136     |
| <b>Anablepsoides amphoreus</b>         | 1.53        | 0.127     |
| <b>Anablepsoides iridescens</b>        | 1.37        | 0.130     |
| <b>Cynodonichthys fuscolineatus*</b>   | 1.33        | 0.155     |
| <b>Scriptaphyosemion cauveti</b>       | 1.54        | 0.124     |

## SUPPLEMENTARY REFERENCES

- Dorn, A., Musilová, Z., Platzer, M., Reichwald, K. & Cellerino, A. (2014). The strange case of East African annual fishes: aridification correlates with diversification for a savannah aquatic group? *BMC Evol. Biol.*, 14, 210.
- Furness, A., Reznick, D., Springer, M. & Meredith, R. (2015). Convergent evolution of alternative developmental trajectories associated with diapause in African and South American killifish. *Proc. R. Soc. B.*, 282, 20142189.
- Pohl, M., Milvertz, F., Meyer, A. & Vences, M. (2015). Multigene phylogeny of cyprinodontiform fishes suggests continental radiations and a rogue taxon position of Pantanodon. *Vertebr. Zool.*, 65, 37–44.
